# Supplementary material for: Guidance of collective cell migration by substrate geometry
Source: Royal Society of Chemistry journal article supplement (doi:10.1039/c3ib40054a), 2013-01-01
Supplement: c3ib40054a_3.pdf [file c3ib40054a_3.pdf]

**Video 1** Sub-confluent MDCK cells migrating on a 200  $\mu\text{m}$  diameter fibronectin pattern. Time stamp shows hours: minutes.

**Video 2** Confluent MDCK cells exhibiting synchronized rotation on a 200  $\mu\text{m}$  diameter fibronectin pattern. Time stamp shows hours: minutes.

**Video 3** Collective behavior persists in over-confluent MDCK cells on a 200  $\mu\text{m}$  diameter fibronectin pattern. Time stamp shows hours: minutes.

**Video 4** 200  $\mu\text{m}$  diameter micropatterns were repopulated with fresh cells after removing confluent cells. The coordinated rotational motion of epithelial cells was only promoted when cells reached a confluent state. Time stamp shows hours: minutes.

**Video 5** MDCK cells migrating on a 100  $\mu\text{m}$  fibronectin pattern exhibiting synchronized rotation after reaching confluence. Time stamp shows hours: minutes.

**Video 6** MDCK cells migrating on a 500  $\mu\text{m}$  diameter fibronectin pattern showing a localized 'vortex'  $\sim 300$   $\mu\text{m}$  in diameter. Time stamp shows hours: minutes.

**Video 7** Numerical simulation of sub-confluent cell clusters confined to a disc. Cell clusters do show coordination, although the collective patterns are evolving over time due to the lack of interaction with static boundaries.

**Video 8** Numerical simulation of cells migrating within a confined disc of size equal to the correlation length of the system.

**Video 9** Numerical simulation of cells migrating within a confined disc of size larger than the correlation length of the system.

**Video 10** Numerical simulation of cells migrating within a confined disc of size much larger than the correlation length of the system.

**Video 11** Snail-1-MDCK cells on 200  $\mu\text{m}$  diameter fibronectin pattern showing collective behavior. However, the rotation is not persistent and changes direction abruptly. Time stamp shows hours: minutes.

**Video 12** Manual tracking of Snail-1-MDCK nuclei on 200  $\mu\text{m}$  diameter fibronectin pattern showing how cells tend to move from the edge of the pattern to the center of the pattern and vice versa.

**Video 13** Manual tracking of wt-MDCK nuclei on 200  $\mu\text{m}$  diameter fibronectin pattern. Unlike Snail-1-MDCK cells, wt-MDCK have little tendency to move from the edge of the pattern to the center or vice versa. Time stamp shows hours: minutes.

**Video 14** Numerical simulation of non-cohesive cells migrating within a confined disc. Ordered migration is observed only transiently similar to experimental observations in Snail-1-MDCK cells. Time stamp shows hours: minutes.

**Video 15** MCF-10A cells (benign breast cancer cells) migrating on 200  $\mu\text{m}$  fibronectin patterns. Cells closer to the edge of the pattern show a collective behavior but those in the centre migrate randomly. Time stamp shows hours: minutes.

**Video 16** MCF-7 cells (invasive breast cancer cells) migrating on 200  $\mu\text{m}$  fibronectin patterns showing little tendency for collective behavior. Time stamp shows hours: minutes.

**Video 17** MDA-MB-231 cells (invasive breast cancer cells) migrating on 200  $\mu\text{m}$  fibronectin patterns showing little tendency for collective behavior. Time stamp shows hours: minutes.
